# Supplementary material
Source: PubMed Central journal article supplement (PMC2797185)
Supplement: supp_M109.023614_jbc.M109.023614-1.pdf [file supp_M109.023614_jbc.M109.023614-1.pdf]

## **Supplemental Figures**

### **p130Cas IS REQUIRED FOR MAMMARY TUMOR GROWTH AND TRANSFORMING GROWTH FACTOR- $\beta$ (TGF- $\beta$ )-MEDIATED METASTASIS THROUGH REGULATION OF SMAD2/3 ACTIVITY**

**Michael K. Wendt, Jason A. Smith, and William P. Schiemann**

From the Department of Pharmacology, University of Colorado Denver, Anschutz Medical Campus, Aurora, Colorado 80045

Address Correspondence To: William P. Schiemann, Department of Pharmacology, MS-8303, University of Colorado Denver, Anschutz Medical Campus, RC1 South Tower, Room L18-6110, 12801 East 17<sup>th</sup> Avenue, PO Box 6511, Aurora, CO 80045. Phone: 303-724-1541. Fax: 303-724-3663. Email: Bill.Schiemann@ucdenver.edu

## Supplemental Figures:

Figure S1: M.K. Wendt, J.A. Smith, and W.P. Schiemann

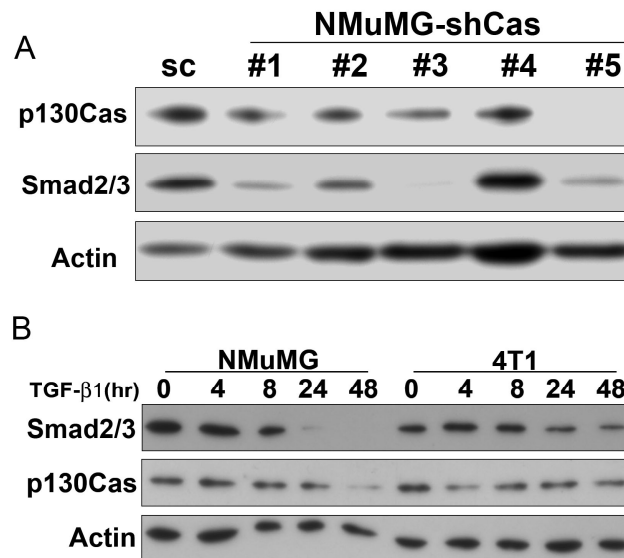

FIGURE S1. **p130Cas-deficiency decreases Smad2 expression in normal MECs.** *A*, Five unique shRNA sequences targeting p130Cas (shCas #1-5) were stably expressed in NMuMG cells, and differences in p130Cas expression were analyzed by immunoblotting with anti-p130Cas antibodies (sc, scrambled shRNA).  $\beta$ -actin immunoreactivity (Actin) is provided as a loading control. *B*, Quiescent NMuMG and 4T1 cells were stimulated with TGF- $\beta$ 1 (5 ng/ml) for varying times, and the resulting whole-cell extracts were immunoblotted with Smad2/3 antibodies, followed by p130Cas and  $\beta$ -actin (Actin) as a loading control. Data are representative of 2 independent experiments and show that Smad2/3 are degraded more readily upon prolonged TGF- $\beta$  treatment in NMuMG cells as compared to 4T1 cells.

Figure S2: M.K. Wendt, J.A. Smith, and W.P. Schiemann

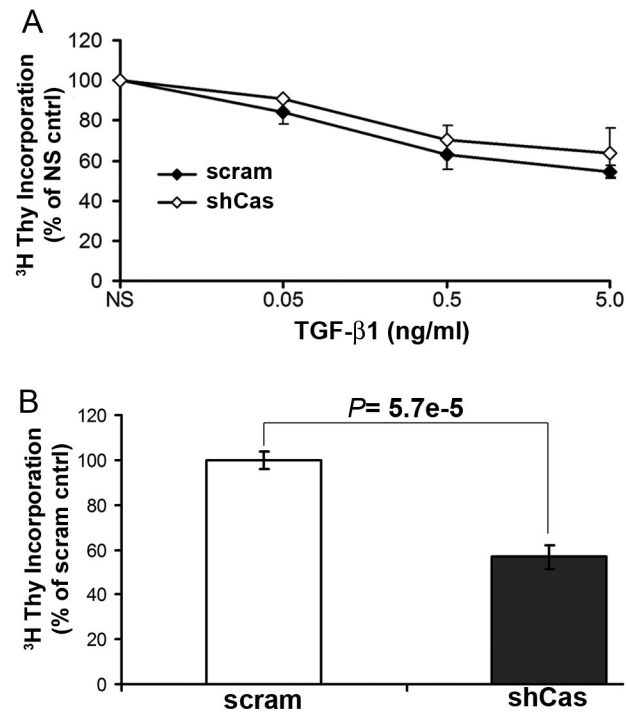

FIGURE S2. p130Cas-deficiency decreases basal 4T1 proliferation but does not affect TGF- $\beta$ 1-growth inhibition when cultured on plastic. *A*, Control (scram) and p130Cas-deficient (shCas) cells were stimulated with the increasing TGF- $\beta$ 1 concentrations for 48 h as indicated. Afterward, [ $^3\text{H}$ ]thymidine incorporation into cellular DNA was determined. Data are the mean ( $\pm$  SE;  $n=3$ ) [ $^3\text{H}$ ]thymidine incorporation normalized to untreated controls (NS, no stimulation). *B*, Data are the mean ( $\pm$  SE;  $n=3$ ) basal [ $^3\text{H}$ ]thymidine incorporation normalized to control (scram) 4T1 cells.
